# Supplementary material for: Combined Polarization/Magnetic Modulation of a Transverse NMR Gyroscope
Source: MDPI journal article supplement (doi:10.3390/s23104649), 2023-05-11
Supplement: s1 [file s1]

# Supplementary Materials: Combined Polarization/Magnetic Modulation of a Transverse NMR Gyroscope

Susan S. Sorensen <sup>1</sup> , and Thad G. Walker <sup>1</sup> \*

## 1. Matrix Inversion Least-Squares Fitting

If we expand Eq. 12 in Section 3.2, each term in the resulting expression will include one known factor and one unknown factor. Known variables include  $\alpha^a$ ,  $\alpha^b$ , and  $\theta_{PM}$ ; unknown variables include  $A^S$ ,  $A^a$ ,  $A^b$ ,  $C^S$ ,  $C^y$ ,  $C^{PD}$ , and the sine and cosine of  $\delta^a - \epsilon_z$  and  $\delta^b + \epsilon_z$ . On the other side of the expression,  $S_z$  is our measured Faraday rotation signal. We can recast the expanded expression as a matrix equation,  $S_z = M.b$ , where  $M$  is a matrix containing all of the known functions, and  $b$  is a matrix containing the unknowns. We can solve this expression for  $b$  through matrix-inversion  $b = (M^t M)^{-1} M^t S_z$ .

Given that there are ten fit parameters, we can measure multiple points before taking a least-squares fit [1] to improve the goodness of fit. Through matrix inversion, we can solve for our unknowns at a series of discrete points and, then, make a least-squares fit to minimize the root mean square difference between the data and our fitting function. We chose to measure 50 points before performing our least-squares fit. The full matrix expression is then given in Eq. 1, where  $\Theta = \text{sign}(\cos(\theta_{PM}))$ , and subscripts 1, 2, ...50 represent points taken at different times.

$$\begin{bmatrix} S_{z,1} \\ S_{z,2} \\ \vdots \\ S_{z,50} \end{bmatrix} = \begin{bmatrix} \sin(\alpha_1^a) & \cos(\alpha_1^a) & \sin(\alpha_1^b) & \cos(\alpha_1^b) & 1 & \sin(\alpha_1^a)\Theta_1 & \cos(\alpha_1^a)\Theta_1 & \sin(\alpha_1^b)\Theta_1 & \cos(\alpha_1^b)\Theta_1 & \Theta_1 \\ \sin(\alpha_2^a) & \cos(\alpha_2^a) & \sin(\alpha_2^b) & \cos(\alpha_2^b) & 1 & \sin(\alpha_2^a)\Theta_2 & \cos(\alpha_2^a)\Theta_2 & \sin(\alpha_2^b)\Theta_2 & \cos(\alpha_2^b)\Theta_2 & \Theta_2 \\ \vdots & \vdots \\ \sin(\alpha_{50}^a) & \cos(\alpha_{50}^a) & \sin(\alpha_{50}^b) & \cos(\alpha_{50}^b) & 1 & \sin(\alpha_{50}^a)\Theta_{50} & \cos(\alpha_{50}^a)\Theta_{50} & \sin(\alpha_{50}^b)\Theta_{50} & \cos(\alpha_{50}^b)\Theta_{50} & \Theta_{50} \end{bmatrix} \begin{bmatrix} C^S A^a \cos(\delta^a - \epsilon_z) \\ C^S A^a \sin(\delta^a - \epsilon_z) \\ C^S A^b \cos(\delta^b + \epsilon_z) \\ C^S A^b \sin(\delta^b + \epsilon_z) \\ C^S C^y + C^{PD} \\ A^S A^a \cos(\delta^a - \epsilon_z) \\ A^S A^a \sin(\delta^a - \epsilon_z) \\ A^S A^b \cos(\delta^b + \epsilon_z) \\ A^S A^b \sin(\delta^b + \epsilon_z) \\ A^S C^y \end{bmatrix} \quad (1)$$

## References

1. Press, W.H.; Teukolsky, S.A.; Vetterling, W.T.; Flannery, B.P. *Numerical recipes in C (2nd ed.): the art of scientific computing*; Cambridge University Press: New York, NY, USA, 1992.

**Disclaimer/Publisher's Note:** The statements, opinions and data contained in all publications are solely those of the individual author(s) and contributor(s) and not of MDPI and/or the editor(s). MDPI and/or the editor(s) disclaim responsibility for any injury to people or property resulting from any ideas, methods, instructions or products referred to in the content.
